# Supplementary material
Source: Springer Nature journal article supplement (https://www.springermedizin.de/resource/supplementary/12958_2014_1270_MOESM2_ESM.pdf/9566944)

**Ovarian endometriotic cyst**

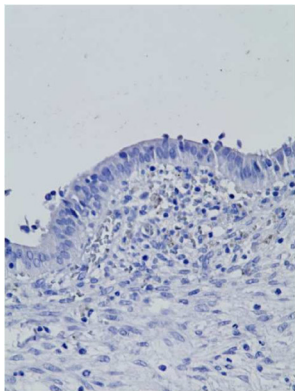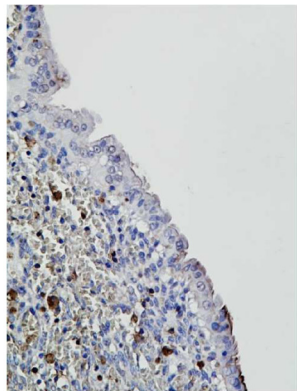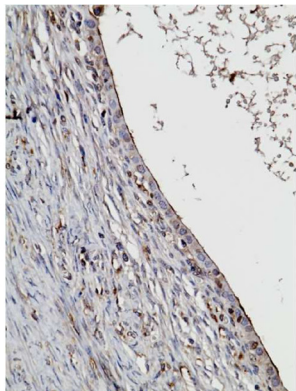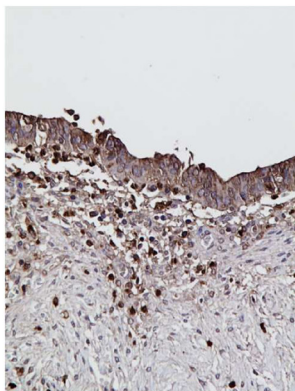

**Endometrium**

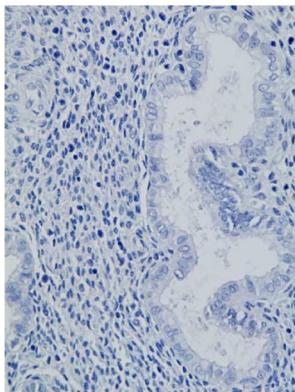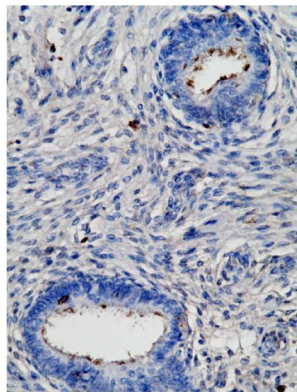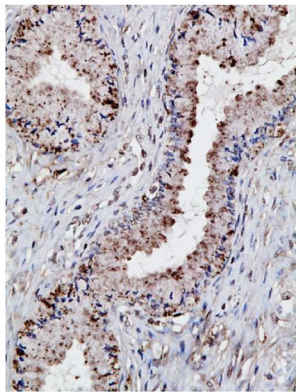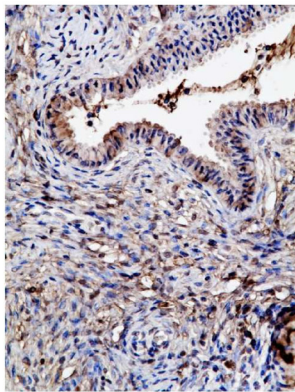

Supplement: MOESM2 [file 9566944]
